# Supplementary material for: Alternative platform for COVID-19 diagnosis based on AuNP-modified lab-on-paper
Source: Royal Society of Chemistry journal article supplement (doi:10.1039/d3an00595j), 2023-01-01
Supplement: d3an00595j1.pdf [file d3an00595j1.pdf]

Supplementary information

**Alternative platform for COVID-19 diagnosis based on AuNPs**

**Pornchanok Punnoy<sup>1</sup>, Tatiya Siripongpreda<sup>2</sup>,**

**Trairak Pisitkun<sup>3</sup>, Nadnudda Rodthongkum<sup>4,5\*</sup>, Pranut Potiyaraj<sup>1,4,5\*</sup>**

*<sup>1</sup> Department of Materials Science, Faculty of Science, Chulalongkorn University, Soi Chula12, Phayathai Road, Pathumwan, Bangkok 10330, Thailand*

*<sup>2</sup> Nanoscience and Technology Interdisciplinary Program, Chulalongkorn University, Phayathai Road, Wangmai, Patumwan, Bangkok 10330, Thailand*

*<sup>3</sup> Chulalongkorn University Systems Biology, Faculty of Medicine, Chulalongkorn University, Patumwan, Bangkok 10330, Thailand*

*<sup>4</sup> Metallurgy and Materials Science Research Institute, Chulalongkorn University, Soi Chula12, Phayathai Road, Pathumwan, Bangkok 10330, Thailand*

*<sup>5</sup> Center of Excellence in Responsive Wearable Materials, Chulalongkorn University, Thailand*

*\*Corresponding author:*

*E-mail addresses: pranut.p @ chula.ac.th (P. Potiyaraj), nadnudda.r@chula.ac.th (N. Rodthongkum)*

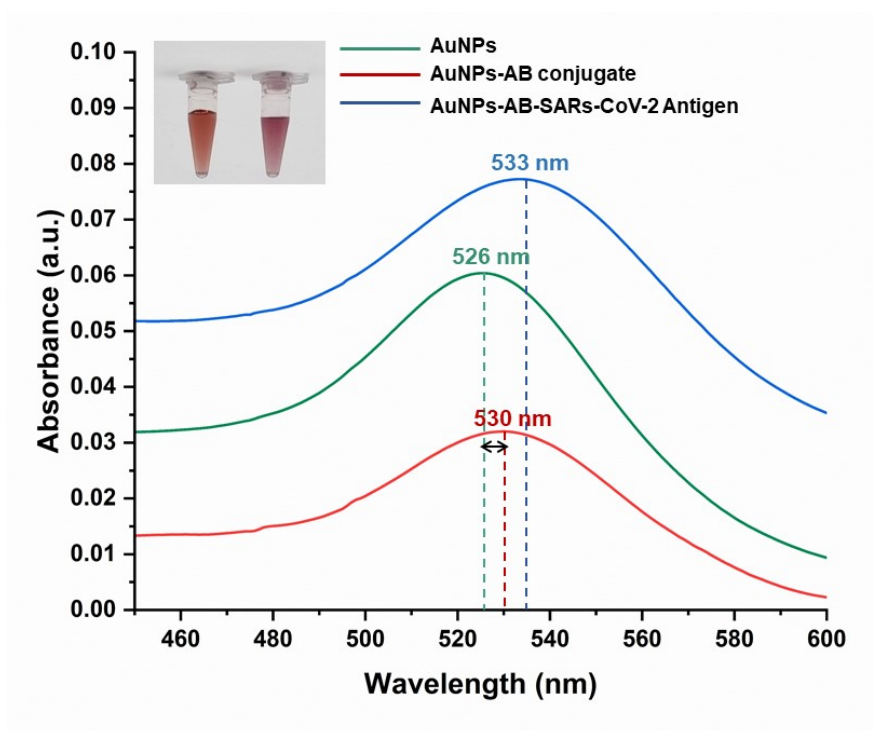

**Figure. S1** Absorption spectra of AuNPs (green line) and AuNPs-Ab in the absence (red line) and presence (blue line) of the SARS-CoV-2 spike antigen.

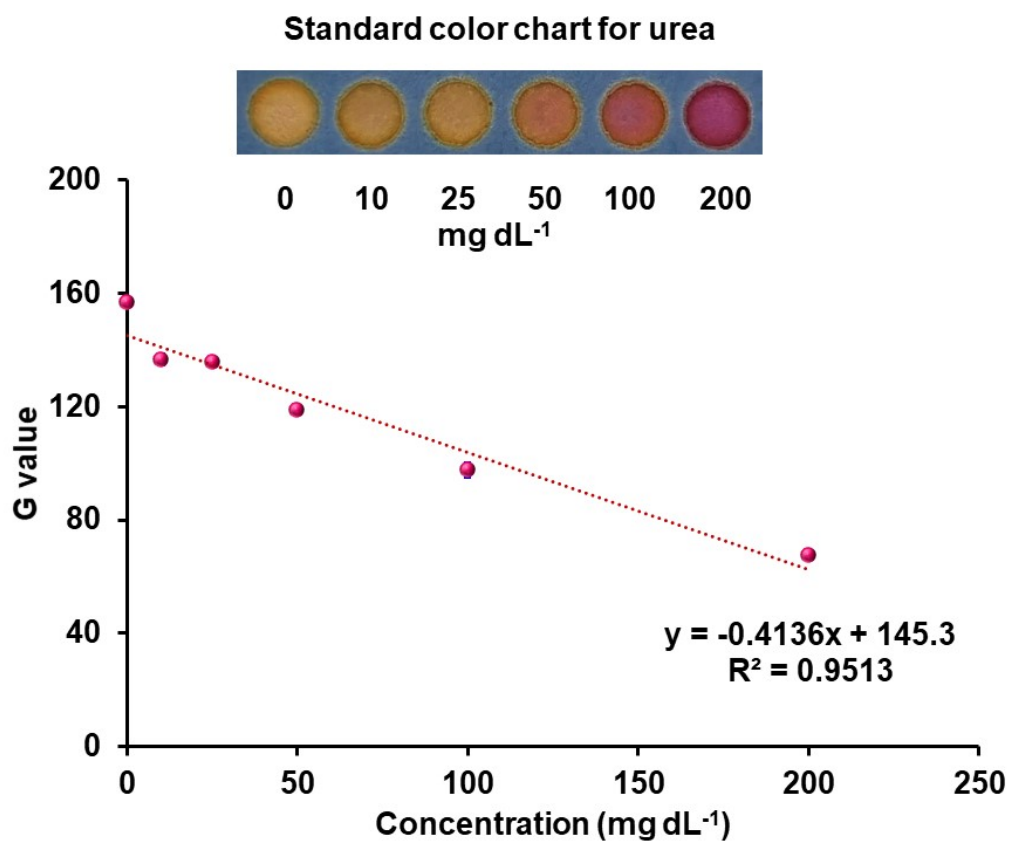

**Figure S2.** Standard color chart of the colorimetric sensor towards different urea concentrations, and a calibration plot between G value and urea concentration ranging from 0-200 mg/dL.

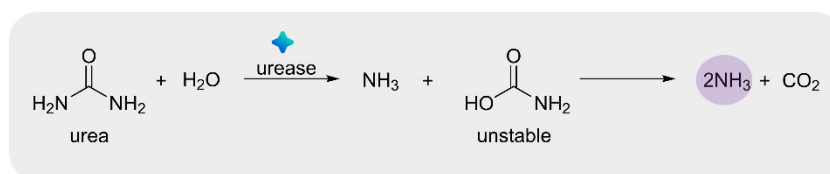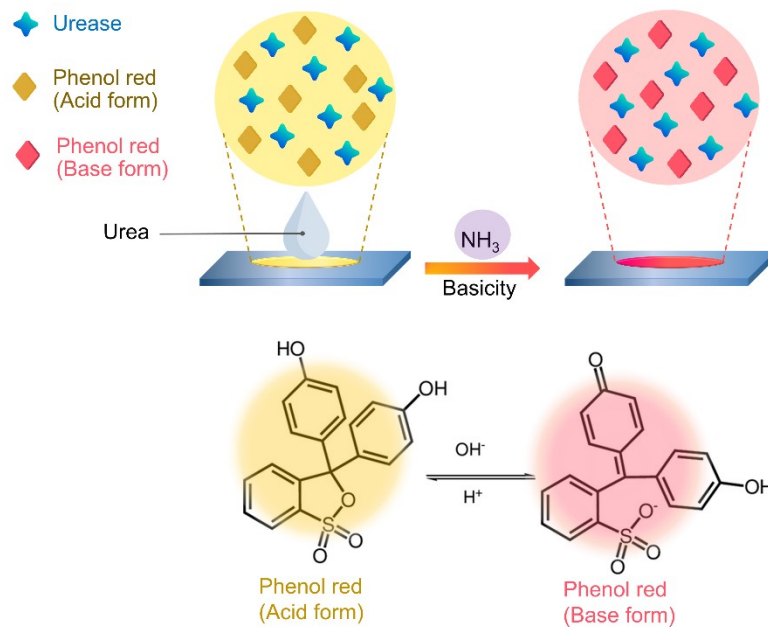

**Scheme S1.** The mechanisms of enzymatic-based colorimetric sensor of urea.

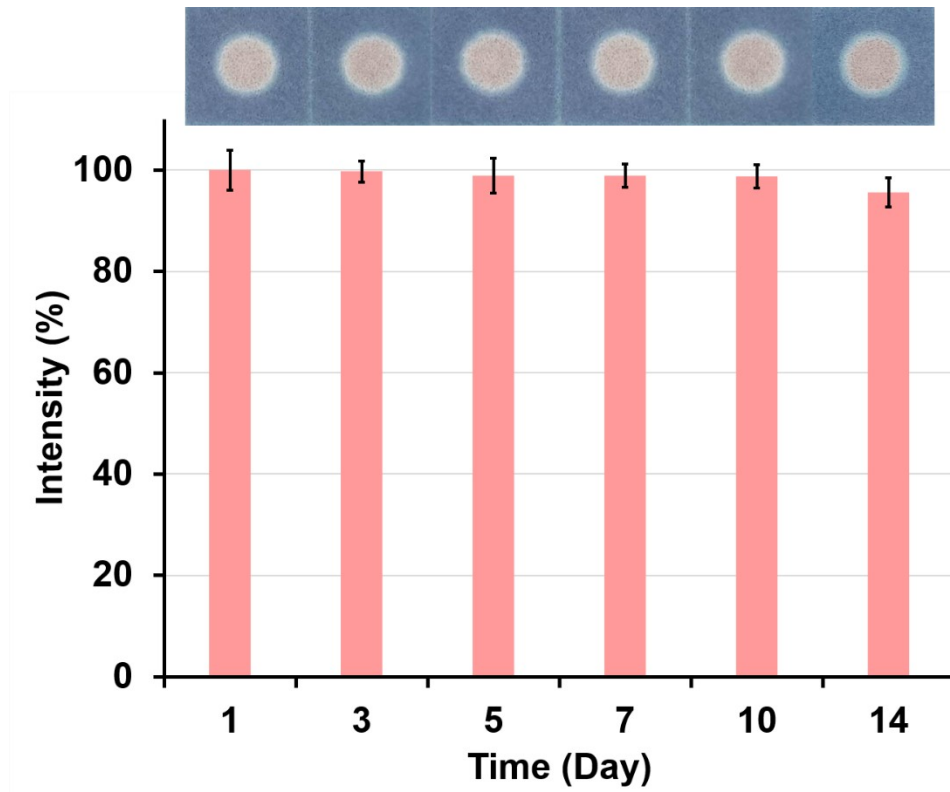

**Figure S3.** Stability of the colorimetric immunoassay of SARS-CoV-2 antigen were stored for: 1 day and 14 days, n=3 (insets: the corresponding photographs).
